# Supplementary material for: An improved course of glycaemia after a bread based breakfast is associated with beneficial effects on acute and semi-acute markers of appetite
Source: Royal Society of Chemistry journal article supplement (doi:10.1039/c5fo00969c), 2016-01-01
Supplement: c5fo00969c1.pdf [file c5fo00969c1.pdf]

Supplemental Table 1: Correlations<sup>1</sup> between glucose, insulin, appetite biomarkers and subjective appetite ratings in the period from breakfast to lunch.

|                                      |     | Glucose iAUC 0-120 | GP 240        | Insulin iAUC 0-120 |
|--------------------------------------|-----|--------------------|---------------|--------------------|
| GP                                   | r = | <b>-0.569</b>      |               |                    |
|                                      | p = | <b>0.000</b>       |               |                    |
| Insulin iAUC 0-120                   | r = | <b>0.594</b>       | <b>-0.641</b> |                    |
|                                      | p = | <b>0.000</b>       | <b>0.000</b>  |                    |
| NEFA 240                             | r = | <b>0.351</b>       | <b>-0.273</b> | <b>0.324</b>       |
|                                      | p = | <b>0.009</b>       | <b>0.044</b>  | <b>0.016</b>       |
| Ghrelin, difference nadir to 240 min | r = | <b>-0.515</b>      | <b>0.378</b>  | <b>-0.488</b>      |
|                                      | p = | <b>0.000</b>       | <b>0.004</b>  | <b>0.000</b>       |
| GIP iAUC 0-240                       | r = | <b>0.540</b>       | <b>-0.641</b> | <b>0.621</b>       |
|                                      | p = | <b>0.000</b>       | <b>0.000</b>  | <b>0.000</b>       |
| PYY 240                              | r = | <b>-0.287</b>      | <b>0.446</b>  | <b>-0.287</b>      |
|                                      | p = | <b>0.039</b>       | <b>0.001</b>  | <b>0.039</b>       |
| Satiety tAUC 0-240                   | r = | -0.244             | 0.258         | <b>-0.271</b>      |
|                                      | p = | 0.072              | 0.057         | <b>0.045</b>       |
| Hunger tAUC 0-240                    | r = | 0.243              | -0.151        | 0.216              |
|                                      | p = | 0.074              | 0.273         | 0.114              |
| Desire to eat tAUC 0-240             | r = | <b>0.270</b>       | -0.259        | <b>0.351</b>       |
|                                      | p = | <b>0.046</b>       | 0.056         | <b>0.009</b>       |
| Hydrolysis index (HI)                | r = | <b>0.594</b>       | <b>-0.695</b> | <b>0.594</b>       |
|                                      | p = | <b>0.000</b>       | <b>0.000</b>  | <b>0.000</b>       |
| Fluidity index (FI)                  | r = | <b>0.621</b>       | <b>-0.450</b> | <b>0.594</b>       |
|                                      | p = | <b>0.000</b>       | <b>0.001</b>  | <b>0.000</b>       |

<sup>1</sup>Spearman's partial correlation coefficients controlling for subjects and corresponding baseline values, p values < 0.05 were regarded as significant (shown in bold).

Supplemental Table 2: Correlations<sup>1</sup> between subjective appetite ratings from breakfast to lunch, meal characteristics and appetite biomarkers in the period from breakfast to lunch.

|                           |     | Satiety tAUC 0-240 | Hunger tAUC 0-240 | Desire to eat tAUC 0-240 | Energy intake at lunch |
|---------------------------|-----|--------------------|-------------------|--------------------------|------------------------|
| Breakfast, portion size   | r = | <b>0.540</b>       | <b>-0.434</b>     | <b>-0.325</b>            | -0.244                 |
|                           | p = | <b>0.000</b>       | <b>0.001</b>      | <b>0.015</b>             | 0.072                  |
| Breakfast, energy content | r = | <b>0.297</b>       | <b>-0.271</b>     | -0.136                   | <b>-0.298</b>          |
|                           | p = | <b>0.028</b>       | <b>0.045</b>      | 0.322                    | <b>0.027</b>           |
| Ghrelin 240               | r = | -0.109             | 0.216             | 0.189                    | <b>0.297</b>           |
|                           | p = | 0.429              | 0.114             | 0.168                    | <b>0.028</b>           |
| PYY 240                   | r = | <b>0.457</b>       | <b>-0.316</b>     | <b>-0.430</b>            | -0.087                 |

|     |              |              |              |       |
|-----|--------------|--------------|--------------|-------|
| p = | <b>0.001</b> | <b>0.023</b> | <b>0.001</b> | 0.541 |
|-----|--------------|--------------|--------------|-------|

<sup>1</sup>Spearman's partial correlation coefficients controlling for subjects and corresponding baseline values, p values < 0.05 were regarded as significant (shown in bold).

Supplemental Table 3: Correlations between subjective appetite ratings after lunch, appetite biomarkers and breath hydrogen excretion.

|                       |     | Satiety<br>tAUC 240-360 | Hunger<br>tAUC 240-360 | Desire to eat<br>tAUC 240-360 |
|-----------------------|-----|-------------------------|------------------------|-------------------------------|
| Ghrelin iAUC 240-360  | r = | -0.155                  | 0.111                  | <b>0.265</b>                  |
|                       | p = | 0.259                   | 0.419                  | <b>0.050</b>                  |
| PYY tAUC 240-360      | r = | 0.228                   | <b>-0.344</b>          | -0.030                        |
|                       | p = | 0.104                   | <b>0.012</b>           | 0.835                         |
| Hydrogen 240          | r = | <b>0.461</b>            | <b>-0.466</b>          | -0.280                        |
|                       | p = | <b>0.001</b>            | <b>0.001</b>           | 0.056                         |
| Hydrogen iAUC 240-360 | r = | <b>0.378</b>            | -0.189                 | -0.194                        |
|                       | p = | <b>0.009</b>            | 0.204                  | 0.191                         |

<sup>1</sup>Spearman's partial correlation coefficients controlling for subjects and corresponding baseline values, p values < 0.05 were regarded as significant (shown in bold).

Supplemental Table 4: Correlations between SCFA and breath hydrogen.

|         |     | Hydrogen iAUC 240-360 |
|---------|-----|-----------------------|
| ACE 360 | r   | <b>0.460</b>          |
|         | p = | <b>0.001</b>          |
| PRO 360 | r = | <b>0.445</b>          |
|         | p = | <b>0.002</b>          |
| ISB 360 | r = | <b>0.318</b>          |
|         | p = | <b>0.029</b>          |
| BUT 360 | r = | 0.124                 |
|         | p = | 0.407                 |

<sup>1</sup>Spearman's partial correlation coefficients controlling for subjects and corresponding baseline values, p values < 0.05 were regarded as significant (shown in bold).

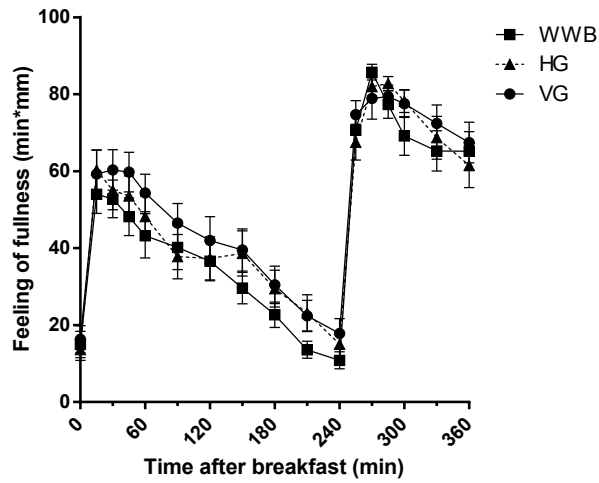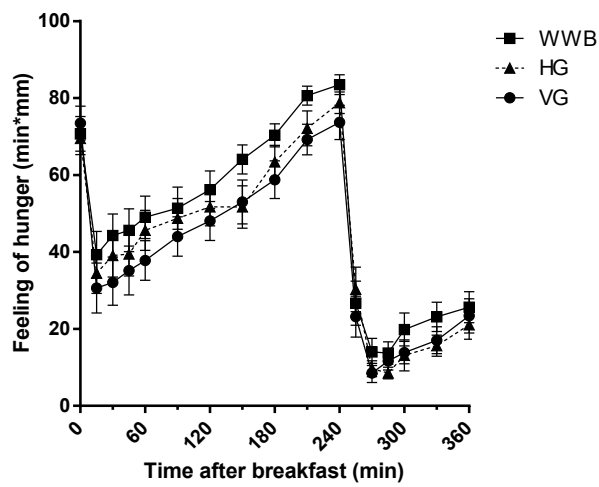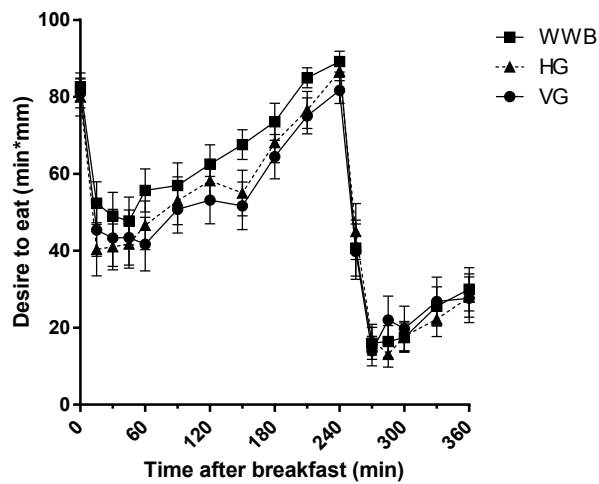

Supplemental Figure 1: Subjective appetite ratings, values are mean values  $\pm$  SEM, (WWB, HG n = 19, VG n = 18).
